# Supplementary material for: Reported and predicted structures of Ba(Co,Nb)1−δO3hexagonal perovskite phases
Source: Royal Society of Chemistry journal article supplement (doi:10.1039/c4cp01542h), 2014-01-01
Supplement: c4cp01542h1.pdf [file c4cp01542h1.pdf]

## Electronic Supplementary Information

### Reported and Predicted Structures of $\text{Ba}(\text{Co},\text{Nb})_{1-\delta}\text{O}_3$ Hexagonal Perovskite Phases

Kathryn A Bradley, Christopher Collins, Matthew S Dyer, John B Claridge, George R Darling and Matthew J Rosseinsky

Below are the atomic coordinates of the lowest energy structures for the compositions  $\text{Ba}_3\text{CoNb}_2\text{O}_9$ ,  $\text{Ba}_5\text{Nb}_4\text{O}_{15}$ ,  $\text{Ba}_8\text{CoNb}_6\text{O}_{24}$ ,  $\text{Ba}_{11}\text{Co}_2\text{Nb}_8\text{O}_{33}$  and  $\text{Ba}_{13}\text{CoNb}_{10}\text{O}_{39}$  in  $2 \times 2 \times 1$  unit cells. For the first three compositions, this also corresponds to the experimental structure. They are given in VASP POSCAR format (for which a description can be found at: [http://cms.mpi.univie.ac.at/vasp/vasp/POSCAR\\_file.html](http://cms.mpi.univie.ac.at/vasp/vasp/POSCAR_file.html)).

The file header indicates the VASP total energy for the converged structure, with settings as given in the main text.

#### $\text{Ba}_3\text{CoNb}_2\text{O}_9$

```
# Ba3CoNb2O9: energy = -459.11791318 eV
1.0000000000000000
 11.7081709476927731  0.0000000000000000 -0.0000000000000000
 -5.8540854738463839 10.1395734725528754 -0.0000000000000000
  0.0000000000000004  0.0000000000000008  7.2034988646604683
Ba Co Nb O
12 4 8 36
Direct
0.1866157999999984 0.3313744000000014 0.4707548317635327
0.0199490999999981 0.4980411000000018 0.1406488682364710
0.3532822999999965 0.6647077000000010 0.8057023000000001
0.5199490999999981 0.9980410000000006 0.1406487682364698
0.6866157999999984 0.8313744000000014 0.4707548317635327
0.8532823999999977 0.1647077000000010 0.8057019000000025
0.3532822999999965 0.1647077000000010 0.8057000000000016
0.5199490999999981 0.4980412000000030 0.1406487682364698
0.6866156999999973 0.3313744000000014 0.4707548317635327
0.8532823000000036 0.6647077000000010 0.8057019000000025
0.1866157999999984 0.8313745000000026 0.4707548317635327
0.0199493000000004 0.9980411000000018 0.1406489682364651
0.8532823999999977 0.1647075999999998 0.3057019999999966
0.3532826000000000 0.6647078000000022 0.3057025000000024
0.3532828000000023 0.1647079000000033 0.3056989999999971
0.8532823999999977 0.6647079000000033 0.3057020999999978
0.1866156999999973 0.8313745000000026 0.9836436141530619
0.0199489999999969 0.4980411000000018 0.6277599858469408
0.6866156999999973 0.8313744000000014 0.9836438141530642
0.5199490999999981 0.4980412000000030 0.6277597858469385
0.5199490999999981 0.9980408999999995 0.6277598858469396
0.0199488000000017 0.9980408999999995 0.6277597858469385
0.6866155000000020 0.3313743000000002 0.9836436141530619
0.1866156999999973 0.3313743000000002 0.9836436141530619
0.7675902367226396 0.2503996632773570 0.1314101653679674
0.2675904367226417 0.7503998632773591 0.1314101653679674
0.2675906367226440 0.9933240734452855 0.1314096653679616
```

0.5246661265547214 0.2503995632773558 0.1314100653679662  
0.0246665265547187 0.2503996632773570 0.1314102653679615  
0.7675904367226419 0.9933237734452820 0.1314101653679674  
0.1818982734452837 0.0790156367226440 0.4799932346320330  
0.5246664265547178 0.7503997632773579 0.1314103653679626  
0.4389743632773607 0.5790159367226405 0.4799934346320354  
0.1032822999999965 0.6647077000000010 0.8057019000000025  
0.4389743632773607 0.8360915265547189 0.4799934346320352  
0.4389745632773560 0.0790156367226441 0.4799930346320379  
0.6818984734452787 0.5790159367226405 0.4799935346320365  
0.9389743632773605 0.3360917265547209 0.4799934346320354  
0.9389743632773605 0.5790157367226382 0.4799934346320354  
0.6818984734452787 0.0790156367226440 0.4799935346320365  
0.9389742632773593 0.8360916265547200 0.4799933346320340  
0.4389745632773560 0.3360920265547173 0.4799930346320376  
0.9389742632773593 0.0790157367226381 0.4799933346320343  
0.6032823000000036 0.1647077000000010 0.8057015999999990  
0.2675906367226440 0.2503996632773570 0.1314096653679616  
0.6032823000000036 0.4147077000000010 0.8057017000000002  
0.6032823000000036 0.6647077000000010 0.8057019000000025  
0.6032823000000036 0.9147077000000010 0.8057019000000025  
0.8532823000000036 0.4147077000000010 0.8057018000000014  
0.1032822000000024 0.1647075999999998 0.8057015999999990  
0.1032822999999965 0.4147077000000010 0.8057019000000025  
0.8532822000000024 0.9147077000000010 0.8057015999999990  
0.3532822999999965 0.4147078000000022 0.8057014999999978  
0.1818983734452849 0.5790157367226382 0.4799936346320377  
0.1032821000000013 0.9147075999999998 0.8057018000000014  
0.2675904367226417 0.4933236734452812 0.1314101653679674  
0.7675904367226419 0.7503996632773567 0.1314101653679674  
0.7675902367226396 0.4933236734452812 0.1314101653679674  
0.3532822999999965 0.9147075999999998 0.8057015999999990  
0.0246665265547187 0.7503998632773591 0.1314103653679626

# Ba<sub>5</sub>Nb<sub>4</sub>O<sub>15</sub>

# Ba<sub>5</sub>Nb<sub>4</sub>O<sub>15</sub>: energy = -769.38441134 eV

1.0000000000000000

11.7762624066164232 -0.0015364228893497 0.0000193176250818

-5.8880239019268572 10.1982084234882944 -0.0001144905597196

0.0000425935640684 -0.0001163106556492 11.9980115303445203

Ba Nb O

20 16 60

Direct

0.6112705656424091 0.7924638717161214 0.2805922779900741  
0.6111966070662953 0.2924798473622336 0.2806188593264700  
0.9446269510448617 0.4590987403608666 0.4222312522138852  
0.1112706656424035 0.7924636717161191 0.2805930779900692  
0.9445458392032261 0.9591182887711359 0.4222861817424949  
0.9444606392636420 0.9592407120382497 0.0597190874189117  
0.7778719160477997 0.1260066127616178 0.8515651957055893  
0.4445467392032225 0.9591177887711372 0.4222858817424914  
0.7779105554161957 0.6260252828378723 0.8515190645307557  
0.4446254510448584 0.4590989403608618 0.4222311522138841  
0.2779104554161937 0.6260251828378711 0.8515189645307545  
0.9445167642204206 0.4592482707428800 0.0596678908669474  
0.1111974070662975 0.2924796473622313 0.2806179593264737  
0.1110819965774516 0.7922881480161365 0.6431327926924741  
0.2778720160478015 0.1260068127616201 0.8515651957055893  
0.1110232382089502 0.2922634646594216 0.6432083586884546  
0.4444607392636499 0.9592408120382508 0.0597189874189106  
0.6110831965774512 0.7922885480161340 0.6431322926924754  
0.4445166642204197 0.4592481707428788 0.0596675908669510  
0.6110224382089481 0.2922628646594217 0.6432090586884486  
0.6111267171573151 0.7925028390370993 0.9563515068670266  
0.4445482252169071 0.4592217874359527 0.7465211562586627  
0.4445121445228822 0.9592366207785611 0.7465088199369371  
0.9445481252169062 0.4592214874359491 0.7465211562586627  
0.9445122445228764 0.9592369207785646 0.7465087199369359  
0.1111267171573150 0.7925028390370993 0.9563515068670266  
0.1111508087169185 0.2925463556497098 0.9563497641566537  
0.6111509087169126 0.2925463556497097 0.9563498641566549  
0.2777150638498685 0.1257201076220761 0.5348731571090443  
0.7777817363326975 0.6257786148737804 0.1681020943070101  
0.2776725641274378 0.1257984809927655 0.1681311261906929  
0.2777816363326958 0.6257786148737804 0.1681017943070137  
0.7777155638498676 0.1257210076220724 0.5348731571090443  
0.7776724641274364 0.1257984809927655 0.1681313261906882  
0.2778214716812656 0.6256492918623385 0.5348099007072500  
0.7778208716812657 0.6256482918623411 0.5348099007072500  
0.3584163892988422 0.2897151004917272 0.2387122965993495  
0.6138743708254417 0.0429415315150133 0.2387845234624965  
0.1939054798877149 0.9569960849272143 0.0431437499616947  
0.8584166892988460 0.2897150004917260 0.2387122965993495  
0.6140369617791118 0.5428072123187965 0.2388434014568015  
0.3607270829969042 0.0451448450736257 0.2388868896535688  
0.3585448692441850 0.7896878270815552 0.2386852770240591  
0.1138743708254422 0.0429416315150144 0.2387840234624977  
0.9472892532278353 0.2113718196619417 0.0432362214774536  
0.1927177303914311 0.2102765364932717 0.0432515096115201  
0.3610074595888418 0.5452773671265572 0.2388034704937498  
0.8610072595888467 0.5452772671265560 0.2388040704937497  
0.1953680663850230 0.7069362724947704 0.4640466008456225  
0.9473199452777866 0.7113317591263636 0.0432207884930911  
0.7783610298370095 0.8762891351737125 0.8514882467282672  
0.6087955928932247 0.5414047349025228 0.6596594724303944

0.3625037247039509 0.7956636354314565 0.6594494157512121  
0.8607267829969075 0.0451446450736233 0.2388867896535676  
0.1088649139633444 0.0414873459483075 0.6597694505045245  
0.9415573926632050 0.2085536434533446 0.4641871262978245  
0.1965485713592597 0.9619251238975400 0.4642097400666643  
0.1950768616327088 0.2068364368852924 0.4641722543758757  
0.9416986722775990 0.7083143564786928 0.4641951614011691  
0.0281884974417404 0.3766299568285748 0.8514576227623145  
0.1966521704357581 0.4618767497446705 0.4641452911279101  
0.4415564926632087 0.2085509434533415 0.4641877262978244  
0.6965505713592620 0.9619259238975352 0.4642093400666596  
0.6950770616327112 0.2068374368852970 0.4641728543758756  
0.4416999722775996 0.7083192564786932 0.4641947614011715  
0.6966472704357574 0.4618759497446753 0.4641462911279076  
0.6953699663850237 0.7069367724947692 0.4640463008456261  
0.1087952928932211 0.5414034349025219 0.6596589724303956  
0.3624367222120640 0.2956200663891413 0.6595253714432511  
0.3629313750876071 0.5419053600266943 0.6598092852520276  
0.0282343612168997 0.6267656268947150 0.8513442763636435  
0.1140370617791130 0.5428067123187977 0.2388440014568014  
0.0281314684809012 0.1267949461289074 0.8513772567231823  
0.5281755194357924 0.8765753538438901 0.8514507297685896  
0.1939587336810725 0.4570137840376692 0.0431366331507173  
0.1928169107151440 0.7103212259303722 0.0433030847570698  
0.4472893532278361 0.2113718196619417 0.0432362214774536  
0.6939052798877123 0.9569959849272132 0.0431437499616947  
0.6927176303914296 0.2102763364932765 0.0432518096115165  
0.4473197452777842 0.7113318591263648 0.0432204884930876  
0.6939591336810704 0.4570138840376703 0.0431367331507185  
0.0281755194357928 0.8765753538438901 0.8514508297685908  
0.8585445692441885 0.7896878270815552 0.2386857770240579  
0.7783569480489938 0.3763039207409102 0.8515008244695119  
0.3629547207140700 0.0418941034338962 0.6597293408371019  
0.8629301750876076 0.5419042600266957 0.6598094852520229  
0.6088647139633424 0.0414871459483052 0.6597692505045293  
0.8625042247039503 0.7956638354314588 0.6594493157512180  
0.8629554207140704 0.0418948034338972 0.6597289408370972  
0.2783568480489929 0.3763042207409137 0.8515005244695084  
0.5281315684808954 0.1267950461289086 0.8513771567231811  
0.5281886974417355 0.3766300568285760 0.8514576227623145  
0.2783612298370119 0.8762890351737114 0.8514886467282718  
0.5282343612168999 0.6267654268947127 0.8513446763636411  
0.8624367222120637 0.2956199663891401 0.6595252714432570  
0.6928174107151430 0.7103216259303697 0.0433028847570746

# Ba<sub>8</sub>CoNb<sub>6</sub>O<sub>24</sub>

# Ba8CoNb6O24: energy = -1228.51536919 eV

1.0000000000000000

11.7506158653766342 0.0003008856931004 0.0000448459983034  
-5.8750457946848806 10.1789455151226313 0.0001664038946425  
0.0000737789709302 0.0003567811040585 19.2007682465907479

Ba Co Nb O  
32 4 24 96

Direct

0.5001535192038833 0.5029670475198359 0.2977780254701839  
0.1668412646486940 0.3363762875202662 0.2094798633194518  
0.3335218822801223 0.1695847075508284 0.9389407759312983  
0.0002614630852209 0.5030047509512787 0.0706071598359172  
0.5002261743253953 0.5029333440898638 0.0706574124133637  
0.5002091066668619 0.0029539179607819 0.0706364482095776  
0.1668400305234885 0.8363917928935025 0.2094686300209142  
0.8335689080415163 0.1695311869891316 0.9389490065907906  
0.0003391117566002 0.0030147531326403 0.0706249859614449  
0.8335576111478337 0.6695075285945883 0.9389183577880266  
0.3335784792139000 0.6695812748696672 0.9389374278519385  
0.6668237139973193 0.3363739210712162 0.2094761952013651  
0.0007463479499148 0.0039785939181440 0.6919196229779425  
0.0001722357413655 0.0029777285029696 0.2977721023008262  
0.5008197376944770 0.0021788073670155 0.6919291062954409  
0.8335416130214306 0.6696602239447342 0.5683488394351380  
0.6668333710664475 0.8363686075141199 0.2094795188937743  
0.8335523386680873 0.1696226070480487 0.5683319447787538  
0.5001422545695400 0.5028095555908689 0.6921791054042031  
0.6674927674829576 0.8356789806429776 0.8155222548158761  
0.5001431375981896 0.0029817175869848 0.2977672746639298  
-0.0004399300168088 0.5033072299649951 0.6916810387141636  
0.6663338608356303 0.3349779630376424 0.8153645935047436  
0.1669969284355683 0.8363354405668157 0.8150855551603307  
0.0001514108982996 0.5029820341661471 0.2977570440156482  
0.1669205956992805 0.8362744832532770 0.4365978112663948  
0.6668431886348726 0.3361956288616336 0.4366108602990363  
0.1663718754981566 0.3371203318531069 0.8152782163921727  
0.6669148025082764 0.8362197521699061 0.4366335024321352  
0.3335936531254252 0.1695923422739995 0.5683478505933495  
0.3335369855728428 0.6696085847601527 0.5683417966243263  
0.1669319462717419 0.3362274340249228 0.4366144525835461  
0.3335580278802200 0.1695921893367416 0.7536794099607431  
0.3335600202528287 0.6695870531190654 0.7536770870771979  
0.8335546889719245 0.1695556522023370 0.7536753893404446  
0.8335503197139794 0.6695585449710523 0.7536803294506939  
0.0000902741822858 0.5030538617324802 0.8742732547027566  
0.5001747213409651 0.5027466948955015 0.8743461140942341  
0.0005010618431369 0.0031590181623864 0.8742891194840551  
0.5002384497766529 0.0026987779920225 0.8743382212434075  
0.1668730027866396 0.3364040562058961 0.0065111780755251  
0.0001531469286096 0.5029504112814837 0.5007388074997640  
0.3335358052540347 0.1697119018690025 0.1384834683857740  
0.3335073066195156 0.6696224485098446 0.3687882743360331  
0.8335649196240402 0.1697397856489032 0.1384948881394955  
0.8335072452747206 0.1696275726983009 0.3687873007603807  
0.0002215633774613 0.0029712471506629 0.5007561232534918  
0.3335163587254549 0.1696288123357835 0.3687926336478941  
0.8335851262308885 0.6697127889694423 0.1384871510341536  
0.6670540992766435 0.8361435259741755 0.6329810067405978  
0.6666849999070337 0.3360928393180166 0.6329536515257872  
0.1669032344237339 0.8363304951479860 0.0064906445651762

0.1669680593710104 0.8364291169644205 0.6329302579321884  
0.6669783182751132 0.8363142483196647 0.0065381664521096  
0.6668795687539664 0.3362779515107779 0.0065273754454041  
0.8334850521258839 0.6696393022807394 0.3687895668632459  
0.3335508229443900 0.6697342456905836 0.1384922777241931  
0.5001928255243786 0.5029318588464132 0.5007830117236342  
0.5002278527801830 0.0028802942607275 0.5007608456708359  
0.1669177801949503 0.3364857101726943 0.6329274495952988  
0.9192226501081399 0.0833968927453934 0.8186135178497695  
0.1695827469736257 0.5839577395700598 0.1828078065513391  
0.9116019188414020 0.3336538253624308 0.1828076903469281  
0.6695958502182919 0.5839745040469722 0.1827940268378104  
0.2553057897877447 0.0056253334743860 0.3245137056049138  
0.9200712469947055 0.8414735998826929 0.8189222037404951  
0.4193859369402086 0.0915301473144558 0.1827427277925670  
0.1695750885139818 0.0839603260801358 0.1828138793119511  
0.6617435671873561 0.0842862106342231 0.8186911914500070  
0.4193938896042256 0.5915420559892531 0.1827381183625017  
0.9975150998190593 0.7554685116808988 0.3244938516104752  
0.2552889153256592 0.5056151381434955 0.3245096042694723  
0.2476642700681142 0.7477678581545133 0.3244801446939770  
0.4116041610444276 0.8336521634180614 0.1828127544009091  
0.9975251254938136 0.2554872982702852 0.3244915543345479  
0.6695868746302163 0.0839619771870827 0.1828021457418202  
0.2476780740046738 0.2477816139086318 0.3244753777180892  
0.4115982970091523 0.3336452290820496 0.1828083749312586  
0.0850482655389074 0.9200074977140994 0.9401340770739171  
0.9194024821927516 0.5915177873967645 0.1827587082018789  
0.9199449036152511 0.3414180418697276 0.8189070532543726  
0.9163904998487996 0.8384669222774160 0.4468528846319841  
0.2467117888749889 0.9978996478473521 0.6885086140177489  
0.9193340349333542 0.0867058889439165 0.4469132393393400  
0.7481101603111937 0.7560819992633945 0.6887168942093761  
0.0054305793935483 0.2549400631484767 0.6885911941061152  
0.0054400869883467 0.7547665338126582 0.6885272717893669  
0.2469714336920900 0.4978592361525970 0.6885874278762451  
0.2485154760317481 0.7565118216386271 0.6885507164493156  
0.5053679792093213 0.2549331704153269 0.6886455565983901  
0.7471359069054566 0.9978469457017998 0.6883547482418644  
0.0820413013548456 0.9192996848517621 0.5671055352746724  
0.0839025016076533 0.6684928031130708 0.5671745413225512  
0.8346022727148970 0.9209624444134107 0.5671102999765609  
0.7480436788065565 0.2559763004707636 0.6886400778135222  
0.4975160582139962 0.7554879952540247 0.3244881289313720  
0.7553170094615911 0.5056313330335259 0.3245202279848250  
0.7476696552059776 0.7477916746599699 0.3244631720498629  
0.6617186889299286 0.5844785350044424 0.8187627624171941  
0.6647233904028788 0.0837396348425570 0.4468623661150728  
0.9193368097927507 0.5866878511771270 0.4469244647872244  
0.9163835044949779 0.3384597081959131 0.4468706446904182  
0.6647206527889139 0.5836889825057365 0.4468652729374225  
0.1617666315548555 0.5843702098902689 0.8188714126172240  
0.4193442217019164 0.0866942609250434 0.4469170491503843  
0.4163237312234636 0.8384432276662012 0.4468520366924274  
0.0820797460469661 0.4192666092283371 0.5671389052857793  
0.1647103222696270 0.0836970083962230 0.4468513661430361  
0.4193395531255415 0.5866835698160972 0.4469001316747418  
0.4163640241978349 0.3384591127635737 0.4468529124720351  
0.1647078259804823 0.5837027881507678 0.4468905277483485  
0.4186569091534387 0.5827476299056483 0.8187144582469990  
0.1618089476518882 0.0842738531110880 0.8186216316729511  
0.4200545318772252 0.8413920073697829 0.8186634892391823  
0.4189020598085008 0.0830670788907432 0.8188637988532826

0.4202975633547730 0.3413376332165617 0.8187475433546296  
0.9193863156852304 0.0915212595038049 0.1827456132332521  
0.0839461089700217 0.1685479337338469 0.5671143139858710  
0.5054200034576218 0.7548520818342269 0.6884263545354514  
0.5832952100900223 0.6707275086913925 0.9400942686837224  
0.2476021219515859 0.7524598537489466 0.0603656210468988  
0.2506612308245210 0.5007438276748216 0.0604520108903456  
0.0023171254696133 0.7557369631376514 0.0604013501522298  
0.5849457075700981 0.9198884217245769 0.9400704506879156  
0.2475953522759179 0.2524503030585880 0.0603418700443330  
0.2506352012913228 0.0007278470199082 0.0604538927294287  
0.0023116092825966 0.2556855432986714 0.0604020143881387  
0.8324697964452357 0.4183193921400536 0.9401552175392789  
0.0832648290853125 0.1706596302174576 0.9401280081002746  
0.0850357566384988 0.4199179981301516 0.9401776151376692  
0.8323383206223600 0.9182473965694550 0.9400799976909817  
0.3323934410301592 0.4181912852969774 0.9401103441159644  
0.4975260173361650 0.2554820693589827 0.3244822479367704  
0.2482823872703498 0.2562299345735302 0.6884262445621993  
0.5023294468107152 0.2557265295837821 0.0604068334601637  
0.7506181041365642 0.0007194634748053 0.0604291561360148  
0.7476053216967675 0.2524361041929398 0.0603503482612444  
0.3324506495528950 0.9182218242366639 0.9401529965243782  
0.5820008626427881 0.9192544638386601 0.5670472999296936  
0.5840006316615470 0.6685759948320771 0.5670758595039853  
0.3346705390826461 0.9211130301737320 0.5671724410508664  
0.7469819279173258 0.4977943913725745 0.6883513197016807  
0.5820176227355167 0.4191780053445917 0.5670858359887402  
0.5839616904608087 0.1685660676805334 0.5671485709202818  
0.3346290446004738 0.4210772472565779 0.5671307273484131  
0.8347149475653891 0.4210348103681248 0.5671898453216339  
0.0832361549078012 0.6706671543150379 0.9402060521160353  
0.7476822486259574 0.2477949442589830 0.3244743397428524  
0.9191559327519162 0.5832859510268908 0.8185418151432056  
0.5833051580102810 0.1706977643100583 0.9401606415930931  
0.5849905180028790 0.4198541696431760 0.9401033622358606  
0.7476004770784184 0.7524368326343028 0.0603325506541929  
0.7506071101431404 0.5007226453612660 0.0604467542068015  
0.5023346170487675 0.7557179408548472 0.0603734776830870  
0.7552990761798780 0.0056204887651707 0.3245122774720735  
0.9115969527616709 0.8336414430230868 0.1828001562839280

# Ba<sub>11</sub>Co<sub>2</sub>Nb<sub>8</sub>O<sub>33</sub>

# Ba11Co2Nb8O33: energy = -1687.55833156 eV

1.0000000000000000

11.7355740693301858 0.0022082946517598 0.0004366845134082

-5.8658805195815917 10.1706945398494852 0.0092747986103039

0.0009961599858189 0.0246112665037712 26.3967975303777607

Ba Co Nb O

44 8 32 132

Direct

0.0103234212426791 0.0074439593388894 0.2225305965671941  
0.6769376370010304 0.3406848877776952 0.3235809845083320  
0.0109491893335800 0.0088544284220394 0.5093167785986953  
0.6769874687555083 0.8406392051071337 0.3235895510182800  
0.8434454648709255 0.6739074733366022 0.4195115692303948  
0.8434556626068942 0.1739325738463439 0.4195059542951769  
0.3434485074402130 0.6738924369790826 0.4194789453333528  
0.1772034519848840 0.3410751102170303 0.1583300845535408  
0.3434450895363347 0.1738638403350733 0.4190073028760218  
0.3441454399645917 0.6746350130024406 0.9614360637541246  
0.1786288934115541 0.8419372099327002 0.8714093200929585  
0.5105855666745183 0.5077107507253359 0.0571348211962600  
0.6770510417885243 0.3408377785028442 0.8711548308178082  
0.5104481206041392 0.0074112918984997 0.0571749596890507  
0.8439213951817569 0.1743214366979441 0.9612089692334371  
0.0102904661171632 0.0073273995989802 0.0571368281108537  
0.3437638422674714 0.1743151062340121 0.9612081587280078  
0.0104138616672515 0.5076486282501935 0.0571371208838212  
0.8438793226917816 0.6743154085496096 0.9612882520151781  
0.6772240626193041 0.8412174466451897 0.8712663098079324  
0.0085642443544116 0.5062831703307858 0.5093430706505706  
0.5090649357540850 0.0060718886087109 0.5091510060809528  
0.1776474553512335 0.3417586892554953 0.8714735205573759  
0.5100718004173797 0.5071126615948904 0.5094643219519096  
0.1769793367764240 0.8406754481040116 0.3235678858883930  
0.1770151968951822 0.8408565437638199 0.1582763696658992  
0.5099143381244299 0.0062539298732228 0.7812079815149295  
0.0104238066646752 0.5070515377734131 0.7814336460443432  
0.6772264337209345 0.3410193880520646 0.1582947687327525  
0.0105288699302821 0.0073051645312408 0.7815288695952840  
0.6771833594113410 0.8409312893395149 0.1582714519639030  
0.8434996638620190 0.6735980218990647 0.6903688153402211  
0.8434044907367494 0.1736295767596787 0.6904242361961380  
0.5087696545217922 0.5059913211425590 0.7812870423492221  
0.0103313233554069 0.5074619832109788 0.2225269026450827  
0.3435503670940980 0.1736507712905820 0.6908291944614615  
0.5102672018507339 0.0074031825721272 0.2225459050444732  
0.6781507358059616 0.8409139643567327 0.5993130622739763  
0.5103077826668494 0.5074320606173029 0.2225417184982084  
0.6760180231087181 0.3389992870596171 0.5993258155651606  
0.1766206261299526 0.8401956666643884 0.5992004987660108  
0.1776244275192046 0.3415475444791559 0.5994153019563887  
0.1770383923606295 0.3407546456364439 0.3235932341212802  
0.3432297962082903 0.6733225485886887 0.6902419900835595  
0.3437259509407053 0.1739493130437242 0.8262901368630055  
0.3434969055980459 0.1737678641872837 0.5544241632333156  
0.8434620129779407 0.1737349198858696 0.5544659710427789  
0.3435128192913548 0.6738045746781807 0.5544524414199308  
0.8436821021084706 0.1739359831979065 0.8262644027867008  
0.8437080544253690 0.6739442673293833 0.8262788487339952  
0.3437651058382957 0.6739924838551739 0.8262302686989933  
0.8434988986618851 0.6738521150583969 0.5545464581891744



0.3436039452693484 0.1741506749625722 0.1065607663678877  
0.1767660230787999 0.8400186053999970 0.7387993883914813  
0.1764141544414267 0.3400061764196203 0.7387649943830162  
0.6770281664487096 0.3403885354073890 0.7387970701761045  
0.6767403537882367 0.8399079848453077 0.7387342308616859  
0.8436478104289058 0.6740106595158415 0.1064634820173169  
0.1772070296647908 0.3408561691883675 0.0104550092353221  
0.5108417857348270 0.0080257424471389 0.9142045247370415  
0.0105148608639373 0.0076063043120425 0.9141766818429676  
0.5102950282493807 0.5074433421813874 0.3702713350300205  
0.5101588537185255 0.0071826666814031 0.3702576647255427  
0.1774182999147476 0.8411080978822687 0.0104745937270837  
0.0101315448760148 0.0073250351132847 0.3702552586590195  
0.0100174780622733 0.5073145800520626 0.3702629300662214  
0.0107508904528419 0.5079404011478313 0.9142338901995742  
0.8436988904949110 0.1741461544598819 0.2742190793493179  
0.5106065319543707 0.5078788000567764 0.9141867416298720  
0.0108266975902237 0.0075537148896416 0.6419229380659681  
0.3437520917250265 0.1741518792301146 0.2741549158913559  
0.3436607748074532 0.6740780523894467 0.2742194584232112  
0.0099936541303626 0.5068918849203082 0.6418806291548718  
0.5100172971589206 0.0067496355829016 0.6419440151351321  
0.3437943632183846 0.6742447078082454 0.1065560186028799  
0.8437947073628606 0.1741845037693464 0.1065369427379483  
0.8436890474374262 0.6741422632714706 0.2741901241448680  
0.6769483715595233 0.8405412407413192 0.4665611760015475  
0.6762760367157162 0.3401786918447360 0.4665102103216064  
0.1763551266652897 0.8403484013459558 0.4665135046960537  
0.1769555013197105 0.3408704830676162 0.4664764705787030  
0.6772726843772037 0.8410252287626987 0.0104444840776893  
0.5102438533598972 0.5068778562367997 0.6419107848595597  
0.6769399914920783 0.3405909446721059 0.0104415430656452  
0.9290194030771415 0.5909522213623091 0.3310167638125944  
0.7586029811375189 0.7572010482446329 0.0495484651726196  
0.6747511709769785 0.0886755183325603 0.3310178296346011  
0.1795920434054040 0.5892909441942348 0.1388162045445867  
0.2587067226412295 0.2573032999169916 0.0494316424046424  
0.9289612609236663 0.0910376730486352 0.3310967094169580  
0.4227543761373561 0.3381383350244644 0.1387280952968899  
0.2645956274988340 0.0102675926268237 0.2418912134944778  
0.4266819830148695 0.3430133721691566 0.3309504782038525  
0.9267186384508097 0.8429553914908919 0.3310267811711228  
0.4284943620718846 0.5947166424452421 0.1388293376689222  
0.1795077682547780 0.0894130395345339 0.1388431294546842  
0.4289073247373699 0.5910122041024067 0.3310570770892720  
0.5125954131836277 0.7593198152414021 0.0497435740394506  
0.9267641885071290 0.3429366742887833 0.3310751492554670  
0.4229433075262361 0.8381519376326307 0.1387924934304081  
0.0125497304400895 0.2595893522471486 0.0495231804069533  
0.4289531188288551 0.0909591217770215 0.3309976919115246  
0.4266834347621987 0.8429688853718942 0.3310260211916541  
0.2603679291955688 0.0051536801789996 0.0498583458451909  
0.6748196906601251 0.5886751101058578 0.3309609545305168  
0.5079484255773818 0.2593717161706865 0.2418898107300777  
0.7607382875450578 0.5055069633833950 0.0495626608876382  
0.1747204044268149 0.0885225905112478 0.3309751644095553  
0.2576663793873241 0.7599963776632911 0.5069192742281045  
0.0079365293951541 0.7593547854252362 0.2419449208791390  
0.0930150004227189 0.6723853089526309 0.4186576581028471  
0.0920480417516963 0.9237476561667671 0.4185723497351507  
0.0154245146046626 0.2594881783625576 0.5067681422579188  
0.2565479736106971 0.0015404079667766 0.5069738848614966  
0.2581026404977635 0.2597261791603825 0.5071245260203110

0.0146591835782057 0.7589093523825954 0.5070700270229654  
0.2574149994193278 0.5015965658747954 0.5070912913809814  
0.0948504673648681 0.6759759944067893 0.9618830063801902  
0.5150665993943054 0.2594449671729551 0.5070406744494578  
0.7571767875290248 0.0015782656401969 0.5069274417059154  
0.5927240238015958 0.6733877922723748 0.6905520236697189  
0.5922935270134961 0.9231386883043224 0.6906969784686217  
0.8432655431763125 0.4237377365383124 0.6903306484297310  
0.09275492220030688 0.1723767540831560 0.6902048562573729  
0.4297593009138723 0.0890765099488874 0.8740591030678116  
0.6718700842210147 0.5889379031067159 0.8737874921895773  
0.9310455480405471 0.3469368037138661 0.8736343324172736  
0.9303325675990539 0.5883686396324114 0.8735742222894834  
0.6727857347941648 0.0897447238770792 0.8739907069612435  
0.9299687561635773 0.8461835647733464 0.8738061469887569  
0.9292034779051263 0.0878918174355087 0.8737423605637474  
0.3429166077811094 0.4238295497715203 0.9619322534465726  
0.5948346189092240 0.1769808356538453 0.9622889036137967  
0.8442880477155242 0.9249164338050854 0.4185287673211538  
0.5950397918614765 0.4249946821670323 0.9620590193162074  
0.0925910749656939 0.4238303488751531 0.4185690632285018  
0.8444577843539782 0.4249603347288045 0.4185178291210618  
0.1721533118309854 0.5881226177855947 0.6019442190637552  
0.4300719453413739 0.3455724198292393 0.6016773304052520  
0.4293523788546264 0.5879767190352435 0.6017526753029916  
0.1718754451810721 0.0875546314386014 0.6017087072365035  
0.4290451129344461 0.8455723872786378 0.6017197252708298  
0.4286473400766283 0.0879873750616816 0.6017394390768311  
0.6725023444428602 0.5887055872756958 0.6017956661477131  
0.7576797382991148 0.7597411356146579 0.5070695687946076  
0.9290063867905299 0.3455427193743621 0.6017478093702850  
0.6717982790413684 0.0876740948212167 0.6021213585839926  
0.9291178525914013 0.8448378741421230 0.6021462132422770  
0.9289860516421826 0.0872372022670050 0.6018274122563280  
0.3429885785768665 0.4228853562764740 0.6900361284572275  
0.5930775246915213 0.1735642102468949 0.6904368737539553  
0.5933792156164198 0.4238025878177648 0.6903813447291064  
0.3432519602409062 0.9233184950387293 0.6905896749923305  
0.9292960020932074 0.5882496063137959 0.6017054685073638  
0.7570898876823899 0.5020668884276080 0.5067672810639641  
0.5149892935458781 0.7593752940240430 0.5067420419914244  
0.7575097340898990 0.2600604087761982 0.5069295638836440  
0.3441904879283196 0.9249658084160264 0.4185430105026350  
0.5933221450359585 0.6724868680996244 0.4185308857117243  
0.5920845491620621 0.9239449060295770 0.4185326592434095  
0.0935800842487088 0.1724329873354271 0.4186185671151224  
0.2586269113892472 0.7572169894021584 0.0496051842652360  
0.3433851593332731 0.9242373186226944 0.9624611342505277  
0.5956273493032225 0.9251841180419853 0.9624909252626132  
0.0951676885564943 0.9243006871750972 0.9621860423406136  
0.6795270398373416 0.5891643556357118 0.1387901472267452  
0.1747749425461498 0.5887108975735139 0.3310497838621539  
0.2587903501295851 0.2535003925253946 0.2419169566241934  
0.9230734238355472 0.3381606771593742 0.1387277758779716  
0.0126804406895032 0.7592620795143113 0.0496483615501706  
0.7588676941732974 0.2577415329743452 0.0495694868226838  
0.2604366710652144 0.5049539605054063 0.0497304095226514  
0.7588954944075974 0.7536020691397681 0.2419085827668315  
0.7646093980502446 0.5102921810518615 0.2419282254766958  
0.5079160334409983 0.7593268246596762 0.2419742379085187  
0.7589096406453402 0.2536080468565657 0.2419461458304958  
0.7646098972606236 0.0102863092459013 0.2419422152081487  
0.4285493567617867 0.0948691738443686 0.1387938002001472

0.9284547552094937 0.5946272883032422 0.1387889348222652  
0.7606677385703887 0.0051048878097762 0.0498874138031750  
0.2588428249727362 0.7535361496750832 0.2419471056692048  
0.6796551390818282 0.0894440081100646 0.1388261019563208  
0.9229229979815988 0.8380364869302378 0.1386804148346808  
0.9287762772753683 0.0949940962321659 0.1388113062786855  
0.3443915904847490 0.4248258766611155 0.4185216668153930  
0.5129073800685262 0.2598660650457134 0.0497223853285906  
0.2645384223353383 0.5102562897319129 0.2419333656572444  
0.5931153621371873 0.1726223033753004 0.4185748286170058  
0.5938802213271015 0.6759049119794277 0.9619961680421617  
0.4287834966258887 0.5886315453389830 0.8733229273044647  
0.7568739552358347 0.7589952551527464 0.7791256265020116  
0.8441104956803048 0.4241976264197928 0.9618905678592400  
0.0941475098377818 0.1757492896728521 0.9619746951972671  
0.0958558509325369 0.4249453735497859 0.9618847995090336  
0.8429437147221146 0.9233298719818064 0.9622054934392013  
0.4310721221187334 0.8478969507275168 0.8742085635130448  
0.5920395734983900 0.4236864143333878 0.4184281706413878  
0.1720981751145690 0.0885160903967587 0.8737345483759530  
0.4302430999742474 0.3467054752532185 0.8736729162547879  
0.0928923681630467 0.4228268504576433 0.6901256849031822  
0.8419801813793117 0.9227335990979312 0.6906354534433784  
0.0935474789658244 0.6734451911302600 0.6905304142470360  
0.0934704432878146 0.9232084943938113 0.6906219974168942  
0.0142608016534554 0.2583096595423200 0.7787305098965615  
0.2576473901924768 0.0015713038324512 0.7791048062560930  
0.2575824951452642 0.2586572986819756 0.7786819754306857  
0.0152337855113817 0.7591291372105057 0.7789799082502756  
0.2566367922100267 0.5005229807207857 0.7784719527945871  
0.2585234685198994 0.7588738361645578 0.7793857959280138  
0.5150511249877532 0.2595366298615241 0.7789968710371777  
0.7566854098793393 0.0012168201540609 0.7790817333978086  
0.7580745454616099 0.2594895690144116 0.7789073572181592  
0.5129114404225884 0.7581485181045284 0.7795197826397051  
0.7578063745233059 0.5020129238350876 0.7789473458901643  
0.1741900851754674 0.5897503507158641 0.8731877289046186  
0.0079248842318963 0.2593485877387858 0.2419823044638151

# Ba<sub>13</sub>CoNb<sub>10</sub>O<sub>39</sub>

# Ba13CoNb10O39: energy = -1997.89023854 eV

1.0000000000000000

11.7603404786490344 -0.0022106777582491 -0.0001309004893584  
-5.8820862856402325 10.1870917218339834 0.0007988317455688  
-0.0003480056743607 0.0022580251952968 31.1976239719942186

Ba Co Nb O

52 4 40 156

Direct

0.6580636924401851 0.8558818629711754 0.5182072366002237  
0.8247216450096587 0.1892654003367163 0.3528445913591095  
0.8245874297292706 0.6894100647501825 0.9669970965001109  
0.9913130730641118 0.5226669917293920 0.1876495923353994  
0.3248712492032060 0.6893209210931504 0.7389065685243639  
0.9914318625254480 0.0225830780102703 0.0480509748003071  
0.8245647599723849 0.1894029775551698 0.9670338625167626  
0.9912989629337656 0.0225970928253296 0.4330049625490828  
0.8247208250838707 0.6892657637471852 0.3528450636175868  
0.9913005373878182 0.5225968516640618 0.4330060334555614  
0.3245765000258290 0.6893837204958498 0.9670445140312020  
0.9914412397153625 0.5226794140513026 0.0480580488369266  
0.4914170677907974 0.5226378534289670 0.0480688242746114  
0.4912995305358395 0.0225971492262565 0.4330050035161705  
0.3245754741547554 0.1893815693448783 0.9670451929575541  
0.4912988917975247 0.5225978892137048 0.4330062375030655  
0.3247214828784470 0.6892650805046744 0.3528446538926250  
0.4913037872278436 0.0226532236501388 0.1876502477652683  
0.6580570616780795 0.8558063902249139 0.6578785108812024  
0.4914003951754298 0.0225972400154540 0.0480442145404229  
0.8248914408779278 0.1893082652363748 0.7389110613332450  
0.6577311468168229 0.8565910995776881 0.8910047317005743  
0.1580639740487282 0.3558831746762788 0.5182069077401228  
0.3247216453319257 0.1892649458385138 0.3528446660702684  
0.6571972632627473 0.3559840798792441 0.8910713703141980  
0.1580665674659774 0.8558898439329651 0.5182087956022715  
0.1580852754441779 0.8558729915359016 0.1331819904487621  
0.9922103728744522 0.0226808450125221 0.8149523918871129  
0.9913153010548489 0.0226655559090386 0.1876503652732078  
0.4913141367613294 0.5226612204523662 0.1876458449720916  
0.1581118137077054 0.3558918545029913 0.1331977892466723  
0.6580817050534977 0.3559690540591072 0.6578892956311230  
0.6580608063499850 0.3558847031302192 0.5182078599598707  
0.1568455689562213 0.3553191681192375 0.8911486733046723  
0.8248090355808874 0.6892730712511164 0.7389441510072250  
0.3248843324652532 0.1893467490353828 0.7389066579645949  
0.6580921121275941 0.8559849998217501 0.2726851711117214  
0.9913283969025433 0.0225886638986756 0.5726379181627187  
0.6580920365402846 0.3559842996066093 0.2726855874305003  
0.1580165447967960 0.8559156321740083 0.8908886422455361  
0.1581260415459259 0.3559459341611843 0.6578940916747166  
0.4914767890706084 0.5226779029135569 0.8151446943991780  
0.4913068287608938 0.0226103121054369 0.5726349941949188  
0.1580909154615939 0.8559830996932262 0.2726845726891030  
0.6580899203995424 0.3558866361480896 0.1331954850145564  
0.4926372591567261 0.0232520322091631 0.8148991770743124  
0.4913316175336850 0.5226346645129123 0.5726636429544003  
0.1580921877581740 0.3559847300573656 0.2726860294897517  
0.1580625928704057 0.8558684931254575 0.6578748782219787  
0.9913387593280542 0.5226621136191143 0.5726470337745432  
0.9917084240596366 0.5221248486742163 0.8150501301618732  
0.6580767046594185 0.8558416667146304 0.1331917801280331

0.3247566933761293 0.6893249223008875 0.8529901478312717  
0.8247339806803237 0.1893156824664388 0.8529939599897025  
0.8247384280191693 0.6893264892801129 0.8529877978836423  
0.3247294837223458 0.1893080036607966 0.8529936448716574  
0.1583934818505850 0.8558584287967368 0.7786880122668038  
0.1580769344583036 0.3558625435168811 0.3932146119208707  
0.4912428132953766 0.0227277957266274 0.9272742835310591  
0.4911164039356783 0.5227535805323467 0.9273066558094887  
0.6583443535468971 0.8558768273783072 0.7787239946651766  
0.6582819197266356 0.3560999032836644 0.7787237497332248  
0.1582685996543260 0.3558910719489449 0.7787290703958336  
0.6580130521202008 0.3560130215979866 0.0086095901009866  
0.9912458720518279 0.0224582859061813 0.9272702252716979  
0.3247076396007119 0.6893248105691596 0.0897502163467123  
0.8247241227452977 0.6893285942767635 0.0897475469301312  
0.6580468625505861 0.8560369530979198 0.0085995639612547  
0.1580209894339751 0.8559703877344379 0.0085875051203689  
0.9911859001053005 0.5227397708813208 0.9272676335840079  
0.9914614885146703 0.5225085023890068 0.6973659655710210  
0.3246913381165847 0.1892679411222598 0.0897545185464145  
0.4914857767918548 0.5225730228975810 0.6973820028353154  
0.8246587073972927 0.1892825306992024 0.0897666883971878  
0.3247268467425909 0.1892551353054308 0.6161556571704927  
0.3247010518560746 0.6892002237141445 0.6161557548093415  
0.9914976761538600 0.0225455383537429 0.6973564849934722  
0.3246607527393961 0.1892825990600122 0.2309950086239625  
0.3246605688796551 0.6892847485417204 0.2309949955301315  
0.4916344892268056 0.0226493070096126 0.6973384188587306  
0.8246615910566975 0.1892831087681426 0.2309948423111613  
0.1578639854892130 0.3558946739175594 0.0086166070771001  
0.8247054219403673 0.6891953131632843 0.6161563173697118  
0.8247037882506538 0.6892930418218267 0.4747174096543342  
0.1580764636280826 0.8558622816539183 0.3932154414441990  
0.3247055698920995 0.1892988441453990 0.4747166473733020  
0.6580751851801220 0.8558624588509931 0.3932149296067192  
0.3247037440840409 0.6892930541766128 0.4747167283754798  
0.8247057756932390 0.1892968505145833 0.4747175799396607  
0.4914262725646912 0.5225814604754152 0.3124572331310149  
0.8247657223486199 0.1892365479380612 0.6161403359801083  
0.4914267040891316 0.0225831417305699 0.3124579370814695  
0.9914258053387182 0.5225817931304881 0.3124571689278689  
0.9914263321521291 0.0225803694846477 0.3124576226934583  
0.6580751763895124 0.3558620531870168 0.3932144462230805  
0.8246652957234961 0.6892872549210980 0.2309939836510493  
0.0754300510921594 0.1892221999811174 0.3528226146644772  
0.0744792757115167 0.4386905788608281 0.3528127149606517  
0.2388779239595562 0.2722773955430755 0.0417343612030009  
0.2417613456000494 0.0202686940705062 0.0417785579076388  
0.8248968497168696 0.9397995724180026 0.3528506173461602  
0.2458832944010659 0.5254695192393243 0.2037367998738527  
0.9936195733357307 0.2751673007387341 0.0417315779673375  
0.4029534197133322 0.3531718510280582 0.1169723731046168  
0.8248966631179373 0.4397984914093451 0.3528505617754011  
0.9105428700936685 0.1057167371973200 0.2790151045554487  
0.7397636621511586 0.2682816123232961 0.2038041454166721  
0.6607046844685850 0.1034376776451121 0.1169697947099245  
0.0754292466035384 0.6892211041936532 0.3528220032748454  
0.9935948360071455 0.7751468351848405 0.0417336659562066  
0.2417675356980066 0.5202596287138855 0.0417420513048080  
0.5754288774751540 0.6892222336983191 0.3528222837650478  
0.3248981670371594 0.9397987027345192 0.3528504382656564  
0.5744791217170735 0.4386903912794865 0.3528128781488803  
0.2388273417002305 0.7722347351330394 0.0417696510847970

0.4935952591330085 0.7751088087685020 0.0417192594229935  
0.4935933912412615 0.2751526586336155 0.0417157623806491  
0.7388517249349007 0.2722437881443020 0.0417433798150054  
0.7417612087566360 0.0202822359027563 0.0417676887378523  
0.7417425529947143 0.5202526994709442 0.0417603685100392  
0.1607349669386363 0.6034306236783518 0.1169553973028612  
0.3248960421237639 0.4397982956633793 0.3528509255124691  
0.7387908783617668 0.7721990506619414 0.0417529713914471  
0.9029470392118318 0.8531854030388581 0.1169870553749692  
0.5744785751898912 0.9386920540052546 0.3528121435600652  
0.5754297319463952 0.1892213235677653 0.3528222908974769  
0.1608164523471942 0.1073239142357947 0.5019829947531942  
0.7458794160427027 0.5254675903164751 0.2037352827533091  
0.7398743751657286 0.5199160092091784 0.4266669224534209  
0.9066946947261908 0.1073149349388975 0.5019272369430687  
0.7404370495489040 0.7739698197532028 0.4266429443350386  
0.4067080604708259 0.3531638328031026 0.5019747928733800  
0.4066971665284705 0.6073189832825312 0.5019283111340344  
0.0746914922456721 0.6901806812976456 0.9678237745445287  
0.4067040327057639 0.8531651282097457 0.5019730276720957  
0.4066920677162322 0.1073118990992670 0.5019259954539903  
0.6608198294700631 0.6073311260106538 0.5019848888017500  
0.9067058931799883 0.3531659964147730 0.5019742540148304  
0.9067014330589372 0.6073177031816720 0.5019275180175043  
0.6608176096642424 0.1073286291858443 0.5019839306932840  
0.1608167021911426 0.6073334819710497 0.5019843561356526  
0.2398738184307231 0.0199151874862026 0.4266659004323994  
0.9087208336708280 0.1043362492126887 0.6641732437004041  
0.5738222924474080 0.1879761117564715 0.7382101355624708  
0.4106392081312527 0.6032209833056599 0.8930596951647003  
0.1527176556257880 0.1035301403102349 0.8930546325925002  
0.4112159153072411 0.8611851489730545 0.8931580253146617  
0.4104143470260490 0.1031123453060712 0.8931523464997062  
0.6532273810789079 0.6038508528867357 0.8929494963147740  
0.9112593130074458 0.3610512923652419 0.8930522822470812  
0.9104531041521077 0.6031089698334292 0.8931778327524426  
0.6528007808263694 0.1035378333843114 0.8930043945758098  
0.9113502145345485 0.8612019883197073 0.8931658332758323  
0.4114976438066260 0.3613681406835448 0.8931189939116214  
0.9103175718378727 0.1031268449724381 0.8931477124614658  
0.4938951432207299 0.7735026107401766 0.4266323096189690  
0.7404380445855173 0.2739693454408123 0.4266428621716713  
0.7398733902758492 0.0199156904382852 0.4266662441704537  
0.4938958395415307 0.2735004621767584 0.4266314429570517  
0.2434987753562520 0.2719835378239029 0.5889160924656481  
0.9886984969840540 0.7703045062043657 0.5889131613203810  
0.2417585869149229 0.5252665238471823 0.5889152011866180  
0.2435384469658705 0.7720235780321287 0.5889233550885626  
0.4886890901664558 0.2702734451157039 0.5889114848777204  
0.7417916865727356 0.0252699462242854 0.5889219178647535  
0.7435290995894174 0.2719955740775528 0.5889235023521638  
0.4886835088185036 0.7703052680551666 0.5889157513080504  
0.7417870592537912 0.5252640023411452 0.5889137899106675  
0.2417933024780228 0.0252807123699209 0.5889294708814871  
0.7435476998150666 0.7720189821175494 0.5889199397987889  
0.4094584557437249 0.3581865297148054 0.6641640570270337  
0.4087317732230971 0.6043645349593747 0.6641566948806484  
0.5746538449202386 0.1901891168600205 0.9677837269200373  
0.1558035647995251 0.1051641973171158 0.6641979909905883  
0.4087261913589695 0.1043345225717182 0.6641841739541628  
0.6557875368233750 0.6052134940909053 0.6641669386907462  
0.9094587365302209 0.3581616542198985 0.6641757309187519  
0.9087452749140926 0.6043626751692551 0.6641680592942125

0.6557752124284928 0.1051812035147781 0.6641731870168397  
0.1557959264377212 0.6052405100562960 0.6641816543731927  
0.9094834210365335 0.8582080432112160 0.6641822620311515  
0.9887188376245860 0.2702996644322330 0.5888989030315349  
0.9067087726887576 0.8531667353966068 0.5019733405667616  
0.2404387324202804 0.2739691815314617 0.4266434038489587  
0.9938954252543942 0.7735015581905418 0.4266320992906351  
0.2398741376236400 0.5199164024681568 0.4266669466711485  
0.2404372440555006 0.7739694435804023 0.4266425575388170  
0.4094585286581472 0.8582050140123756 0.6641991850067585  
0.7397636842086621 0.7682802311216369 0.2038027588023693  
0.5763451877686570 0.4393828267430518 0.9677242823135237  
0.5747796478637295 0.6902787684520832 0.9677323212433674  
0.9105419441288135 0.6057161644757043 0.2790152075104029  
0.6556997533715145 0.1035133392248581 0.2790297099640345  
0.9886908451282920 0.7743216229242014 0.2038336792994085  
0.9082176623378760 0.3584100587613394 0.2790449440222597  
0.6557002241600276 0.6035134955969347 0.2790304857705379  
0.4105277176382755 0.6111411727851330 0.1169418335685321  
0.1607263265261707 0.1034592617932410 0.1169613359598241  
0.4105430033606688 0.1057164810916740 0.2790149112256594  
0.4082182346756229 0.8584096870961556 0.2790443409420456  
0.1556992392090649 0.1035136039264737 0.2790298270873655  
0.4029792681280147 0.8531836195033806 0.1169863000547647  
0.4105630104814146 0.1111660680558258 0.1169503194268383  
0.4105418827279853 0.6057157021047618 0.2790156230391985  
0.4082177771816863 0.3584100904730860 0.2790456281461512  
0.6607404949197936 0.6034492932278818 0.1169534645368477  
0.1556995196039732 0.6035134822459581 0.2790299755970211  
0.9029445628225125 0.3531726764035156 0.1169801375882082  
0.9105235969706865 0.6111379591876939 0.1169456026949145  
0.0744779346336143 0.9386915145399907 0.3528120222756667  
0.2397708557257515 0.2682876230019663 0.2038031119140952  
0.2397675591394821 0.7682813690644175 0.2038014078715035  
0.2458822604731692 0.0254727817401333 0.2037349597012426  
0.4886935609552361 0.2743267337737799 0.2038341723761179  
0.9886891049908446 0.2743223982472450 0.2038338589951322  
0.9082165139620300 0.8584096194678764 0.2790446898231405  
0.7458839824267843 0.0254717065316518 0.2037349878213173  
0.4886928845812238 0.7743196118577560 0.2038338762498337  
0.0761607753826475 0.9394142491921097 0.9678256947478548  
0.9938967672591797 0.2735017995515506 0.4266313183484792  
0.9967007850104703 0.2754187560123372 0.8130004378262227  
0.4967814286279146 0.7752264560965669 0.8129361824361128  
0.5761389245160745 0.9393041428200268 0.9677990825171925  
0.8237147902339732 0.4379491789139802 0.9677306832299416  
0.0747339876314611 0.1903522288531880 0.9677868576472386  
0.0762148830098122 0.4392174839719920 0.9677443570757154  
0.8237284457119090 0.9379720074370529 0.9677769263109621  
0.3239885931016580 0.4381225076377151 0.9677019194801137  
0.3257129829889216 0.4395947859747523 0.7381853770232814  
0.1527517060987438 0.6037885716025445 0.8930765507440058  
0.7385289984852941 0.5173571723212692 0.8128216494566560  
0.5742273647231247 0.4399229283798691 0.7381194453408173  
0.3255053508503823 0.9394778975220031 0.7382850413436836  
0.5738109979475777 0.6880961688671051 0.7381837038096497  
0.5741738457853093 0.9401084273780992 0.7382142830150088  
0.3237793034043751 0.9379670870708303 0.9678026503378651  
0.8257577591276520 0.4395985271244751 0.7382072483076547  
0.0742620889357506 0.4400310740998816 0.7381490505496738  
0.8257395524967415 0.9396351846048980 0.7382475583506619  
0.0737608909778646 0.6880377063844367 0.7382472401549696  
0.7386974077725842 0.7751204444867535 0.8128157501703739

0.0740451419929728 0.9399748917180288 0.7382425624610305  
0.2384062115406932 0.0171313337375049 0.8129106778994147  
0.2387185732575966 0.2750975325453415 0.8128545042061589  
0.9962750641159913 0.7751173494609256 0.8130432038825172  
0.2386633151599176 0.5173435157096685 0.8128538357375042  
0.2384700272059788 0.7749715966734271 0.8129455128922957  
0.4968200195466466 0.2754476329575891 0.8129587099952880  
0.7386409008262287 0.0174905160641489 0.8129673091573936  
0.7388444019653371 0.2750964642081504 0.8128591592971539  
0.0738581971298914 0.1881012313568285 0.7382092462468705  
0.9105311781524884 0.1111548415587011 0.1169429145465401
